# Supplementary material for: Demystifying the mechanism of NMP ligands in promoting Cu-catalyzed acetylene hydrochlorination: insights from a density functional theory study
Source: Royal Society of Chemistry journal article supplement (doi:10.1039/d0qi00694g), 2020-01-01
Supplement: d0qi00694g1.pdf [file d0qi00694g1.pdf]

## Supporting Information

### Demystifying the mechanism of NMP ligands in promoting Cu-catalyzed acetylene hydrochlorination: Insights from density functional theory study

Chaoyue Zhao,<sup>a</sup> Xianming Zhang,<sup>a</sup> Ziting He,<sup>a</sup> Qingxin Guan\*<sup>a</sup> and Wei Li\*<sup>a</sup>

a. Address here. College of Chemistry, State Key Laboratory of Elemento-Organic Chemistry, Key Laboratory of Advanced Energy Materials Chemistry (Ministry of Education), Nankai University, Tianjin 300071, China. E-mail: [qingxinguan@nankai.edu.cn](mailto:qingxinguan@nankai.edu.cn); [weili@nankai.edu.cn](mailto:weili@nankai.edu.cn)

## Contents

|                                                                                                                                                                                               |    |
|-----------------------------------------------------------------------------------------------------------------------------------------------------------------------------------------------|----|
| Table of Contents.....                                                                                                                                                                        | S1 |
| Fig. S1 Optimized geometries of A-1n Cu(II)/AC and C-1n Cu(I)/AC (n = a–e)...                                                                                                                 | S2 |
| Fig. S2 Copper 2p XPS spectra of fresh catalysts (a) CuCl <sub>2</sub> /AC and (b) CuCl <sub>2</sub> -NMP/AC; used catalysts (c) CuCl <sub>2</sub> /AC and (d) CuCl <sub>2</sub> -NMP/AC..... | S3 |
| Table 1 Surface Cu Components of Catalysts (XPS Cu 2p).....                                                                                                                                   | S3 |
| Fig. S3 Cu LMM Auger spectra of used catalysts (a) CuCl <sub>2</sub> /AC and (b) CuCl <sub>2</sub> -NMP/AC.....                                                                               | S4 |
| Fig. S4 Adsorption configurations and energies of C <sub>2</sub> H <sub>2</sub> on Cu <sup>0</sup> complexes.....                                                                             | S4 |
| Fig. S5 TGA curves of fresh and used catalysts (a) CuCl <sub>2</sub> /AC and (b) CuCl <sub>2</sub> -NMP/AC.....                                                                               | S4 |
| Fig. S6 Energy profiles of acetylene hydrochlorination of HCl and C <sub>2</sub> H <sub>2</sub> with catalysts Cu/AC and Cu-NMP/AC along other possible pathways.....                         | S5 |
| Fig. S7 Energy profile of acetylene hydrochlorination of HCl and C <sub>2</sub> H <sub>2</sub> with the NMP catalyst.....                                                                     | S6 |

**Fig. S8 Energy profile of acetylene hydrochlorination of HCl and C<sub>2</sub>H<sub>2</sub> with B-1 and B-1a catalysts.....S7**

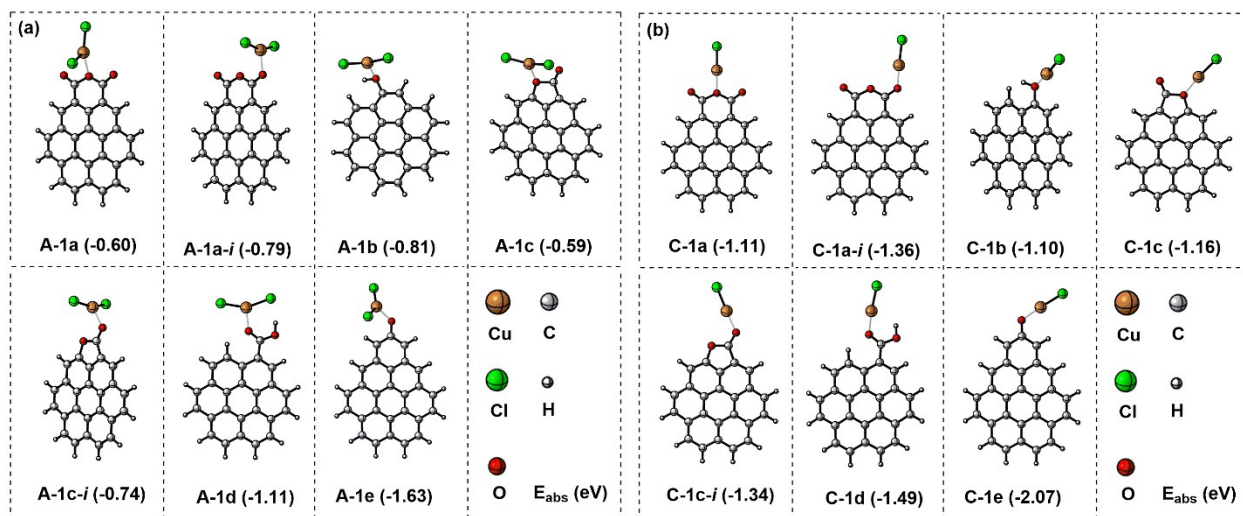

Fig. S1 Optimized geometries of **A-1n** Cu(II)/AC and **C-1n** Cu(I)/AC.

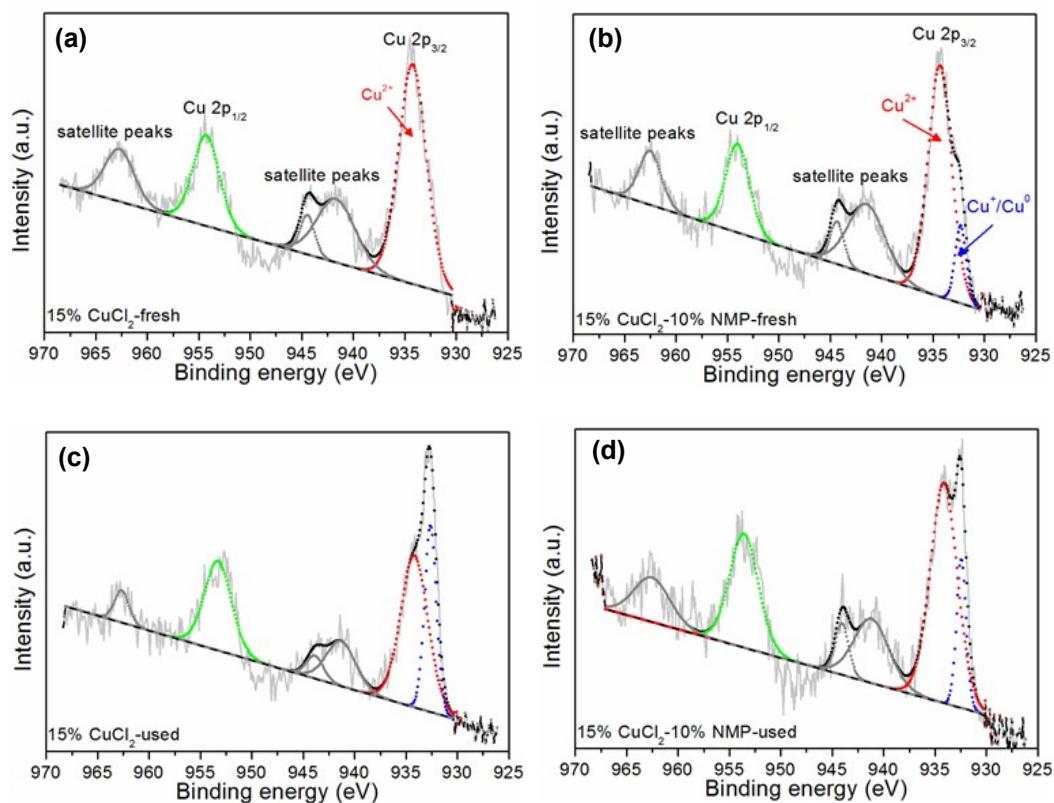

Fig. S2 Copper 2p XPS spectra of fresh catalysts (a) CuCl<sub>2</sub>/AC and (b) CuCl<sub>2</sub>-NMP/AC; used catalysts (c) CuCl<sub>2</sub>/AC and (d) CuCl<sub>2</sub>-NMP/AC.

Table 1 Surface Cu Components of Catalysts (XPS Cu 2p)

| Catalyst                           | Area <sub>Cu<sup>2+</sup></sub> (%) | Area <sub>Cu<sup>+</sup>/Cu<sup>0</sup></sub> (%) |
|------------------------------------|-------------------------------------|---------------------------------------------------|
| 15%CuCl <sub>2</sub> -fresh        | 90.48                               | 9.52                                              |
| 15%CuCl <sub>2</sub> -10%NMP-fresh | 86.35                               | 13.65                                             |
| 15%CuCl <sub>2</sub> -used         | 65.37                               | 34.63                                             |
| 15%CuCl <sub>2</sub> -10%NMP-used  | 80.71                               | 19.29                                             |

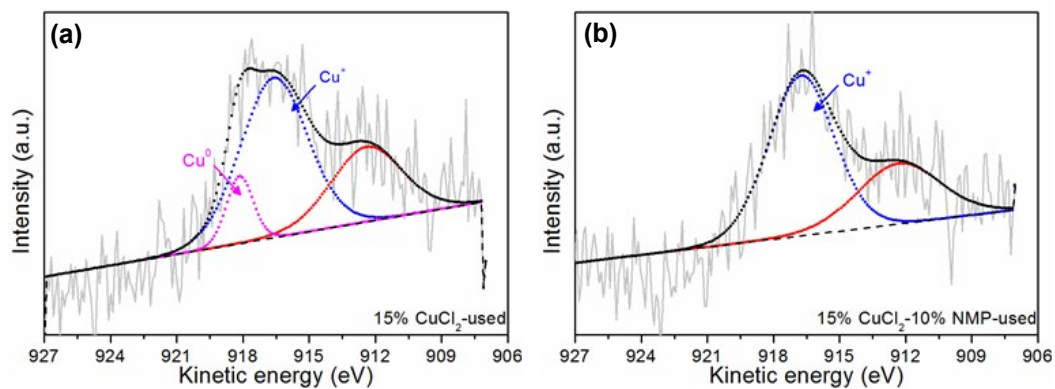

Fig. S3 Cu LMM Auger spectra of used catalysts (a)  $\text{CuCl}_2/\text{AC}$  and (b)  $\text{CuCl}_2\text{-NMP}/\text{AC}$ .

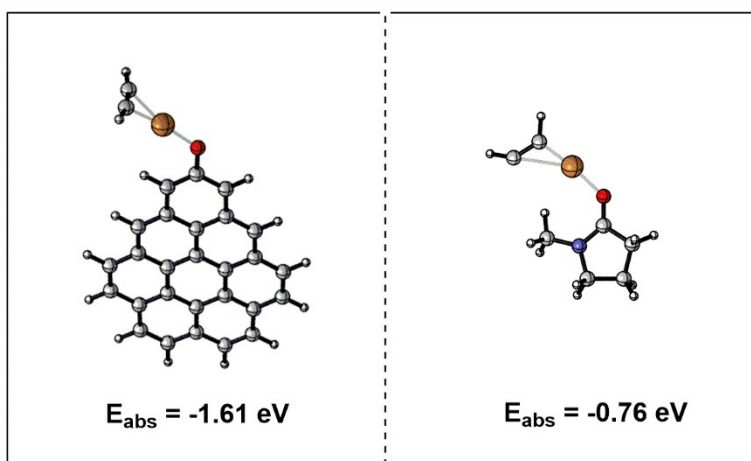

Fig. S4 Adsorption configurations and energies of  $\text{C}_2\text{H}_2$  and  $\text{HCl}$  on  $\text{Cu}^0$  complexes.

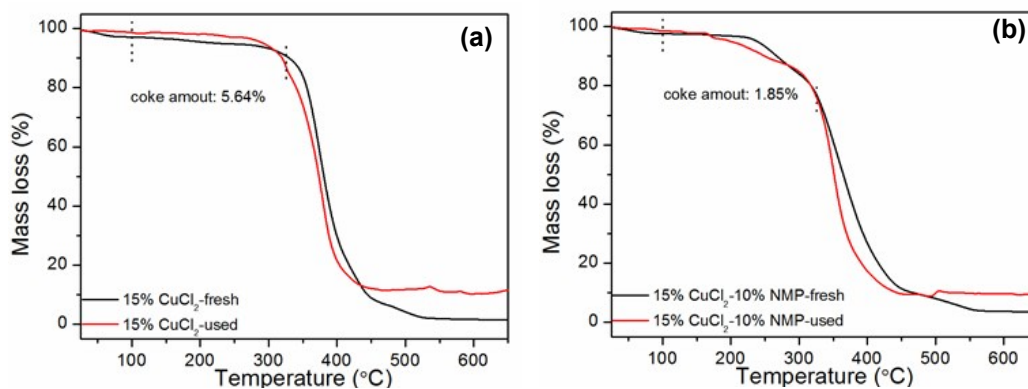

Fig. S5 TGA curves of fresh and used catalysts (a)  $\text{CuCl}_2/\text{AC}$  and (b)  $\text{CuCl}_2\text{-NMP}/\text{AC}$ .

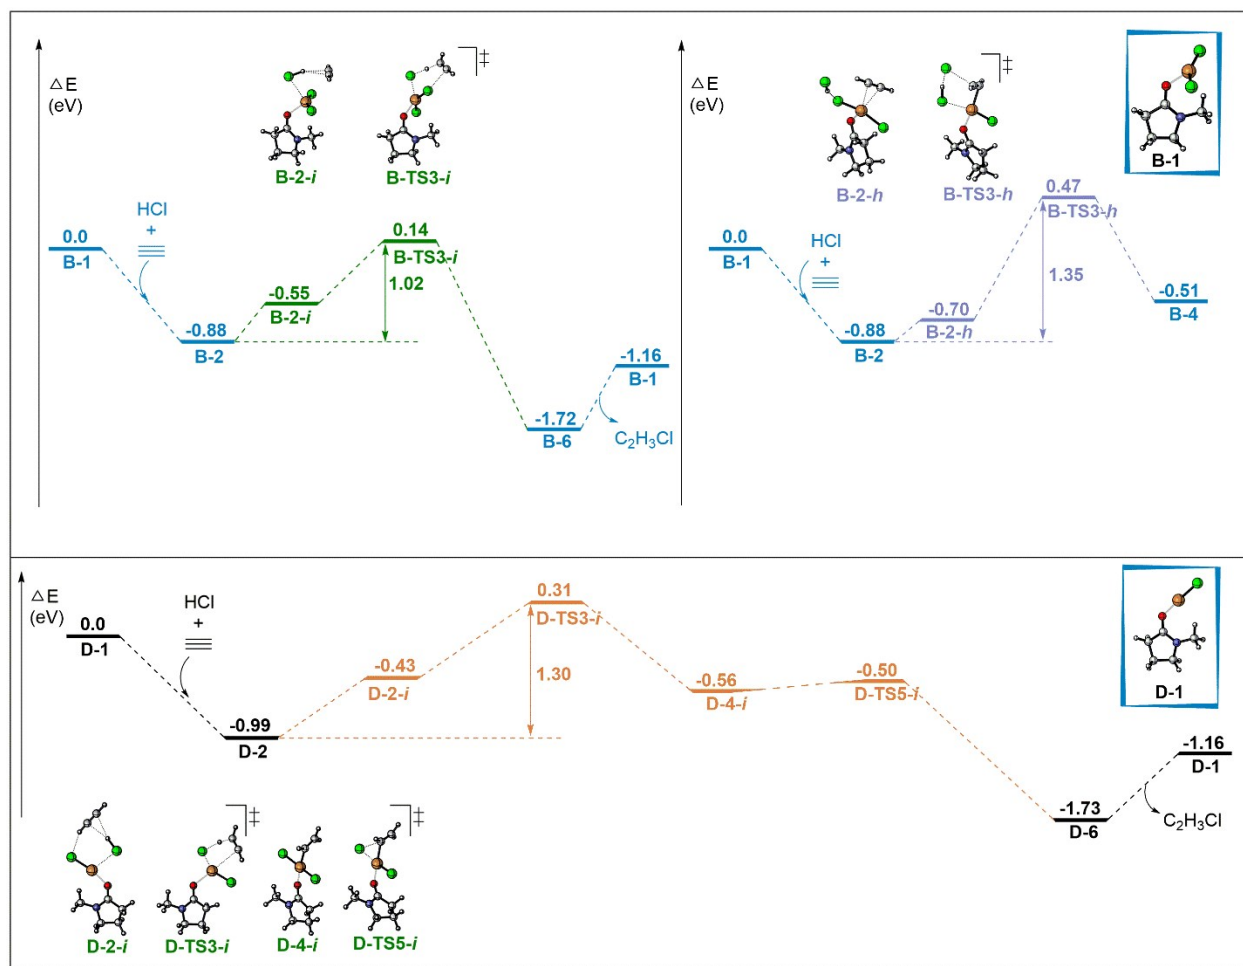

Fig. S6 Energy profiles of acetylene hydrochlorination of HCl and C<sub>2</sub>H<sub>2</sub> with the Cu-NMP/AC catalyst along other possible pathways.

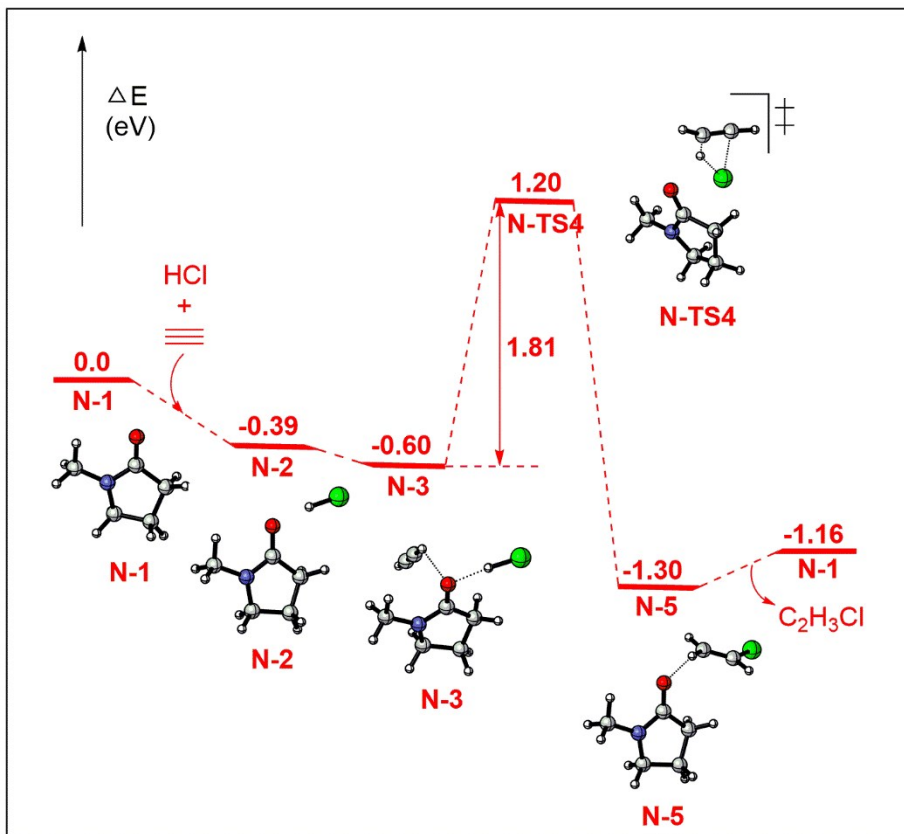

Fig. S7 Energy profile of acetylene hydrochlorination of HCl and  $C_2H_2$  with the NMP catalyst.

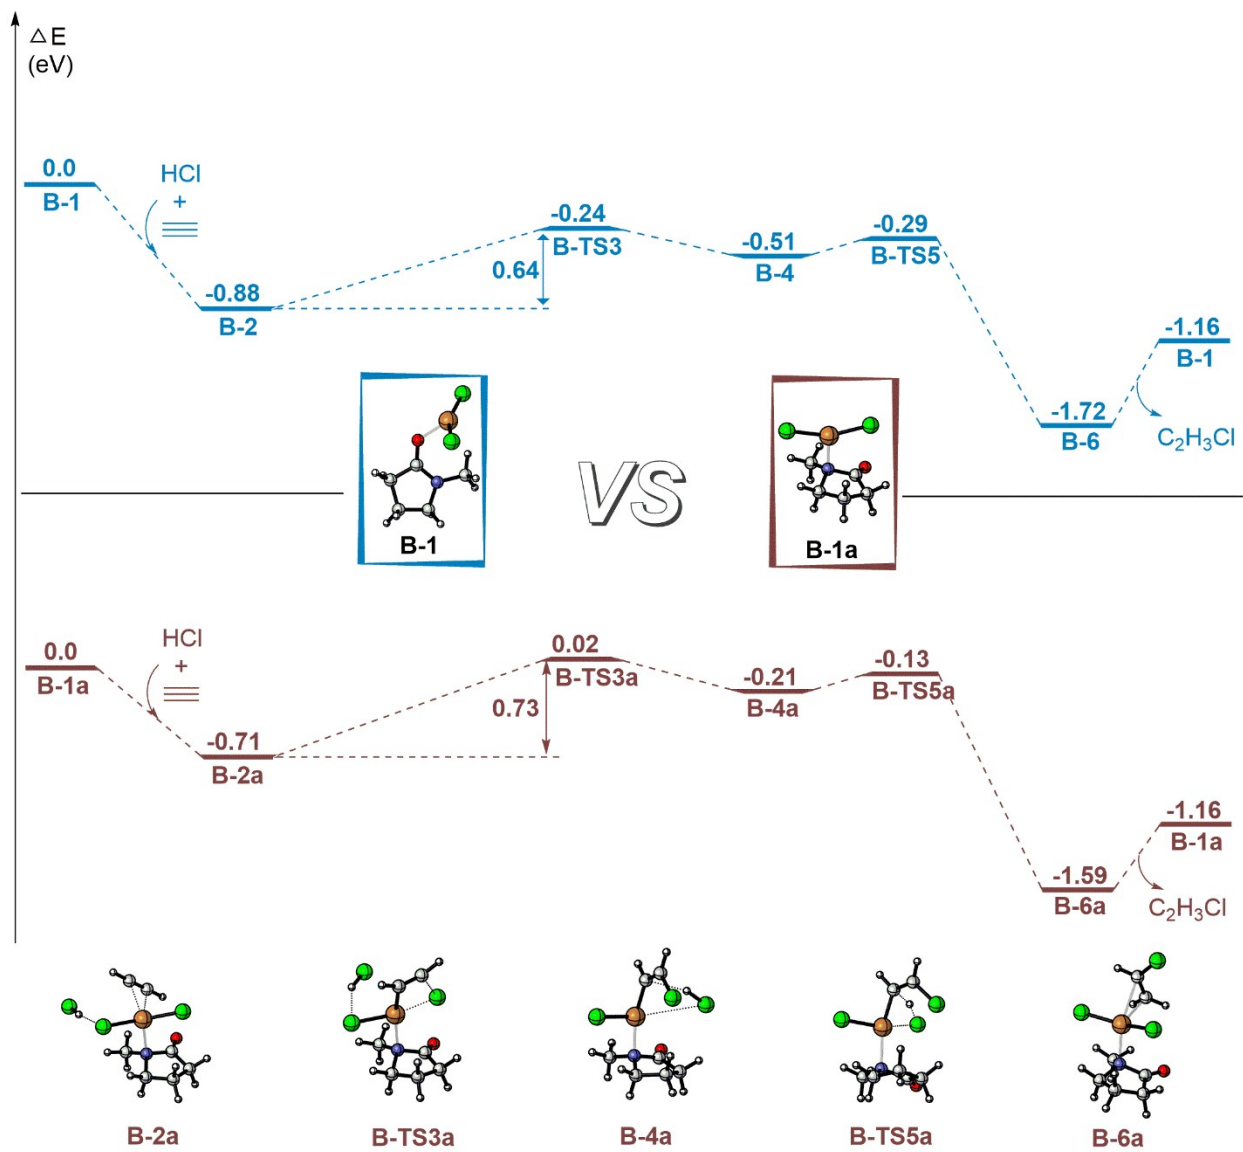

Fig. S8 Energy profile of acetylene hydrochlorination of HCl and  $C_2H_2$  with **B-1** and **B-1a** catalysts.
